# Supplementary material for: Assessing the origins of the European Plagues following the Black Death: A synthesis of genomic, historical, and ecological information
Source: PubMed Central journal article supplement — Proc Natl Acad Sci U S A. 2021 Aug 31;118(36):e2101940118. doi: 10.1073/pnas.2101940118 (PMC8433512; doi:10.1073/pnas.2101940118), 2021-08-31
Supplement: pnas.2101940118.sapp.pdf [file pnas.2101940118.sapp.pdf]

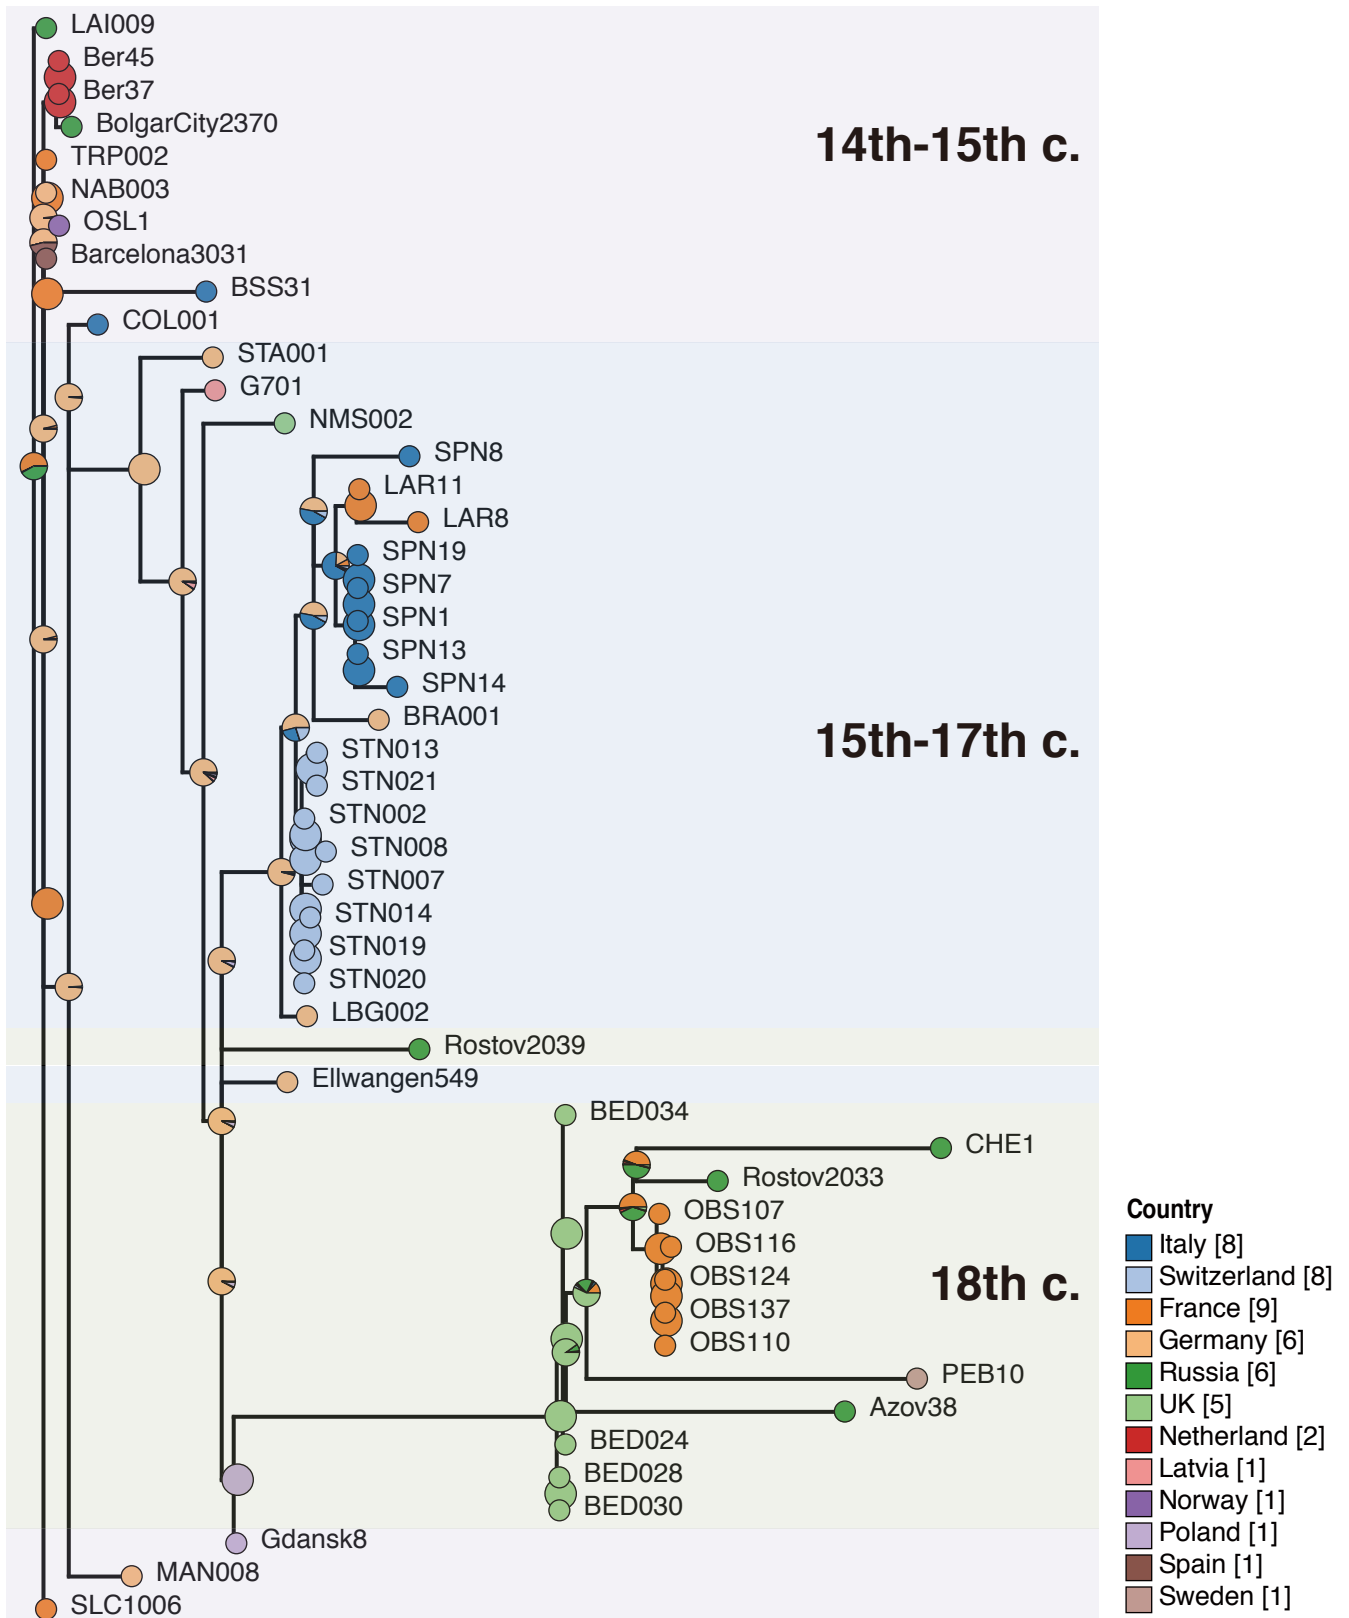

Fig. S1. Accessed transmission among different regions. The phylogenetic tree was obtained using Bayesian MCMC method implemented by phytools package for R. The pie chart at the internal node of the MCMC tree indicated the ancestor source probability of its descendent clades. Except for the Gdansk8 node, all other internal nodes of the tree were sourced from Western Europe, including the node of 14th-15th c., which appears to have originated in France or Germany with a high posterior probability. See the text for an explanation.
